# Supplementary material for: Identification of Key Genes Associated with Endothelial Cell Dysfunction in Atherosclerosis Using Multiple Bioinformatics Tools
Source: Hindawi journal article supplement (doi:10.1155/2022/5544276), 2022-01-01

**A**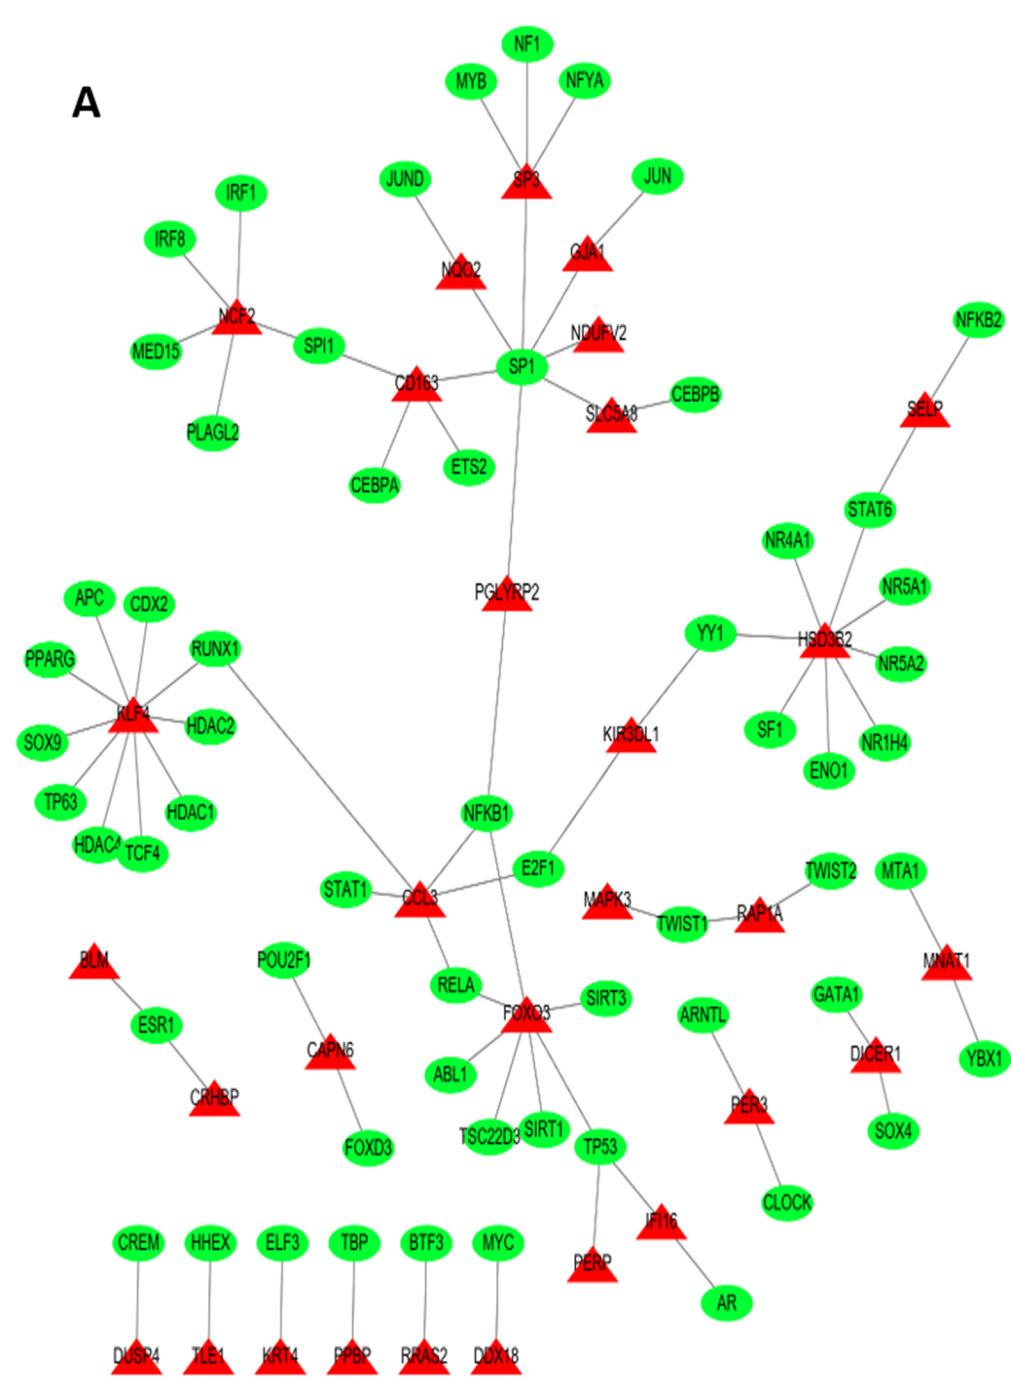**B**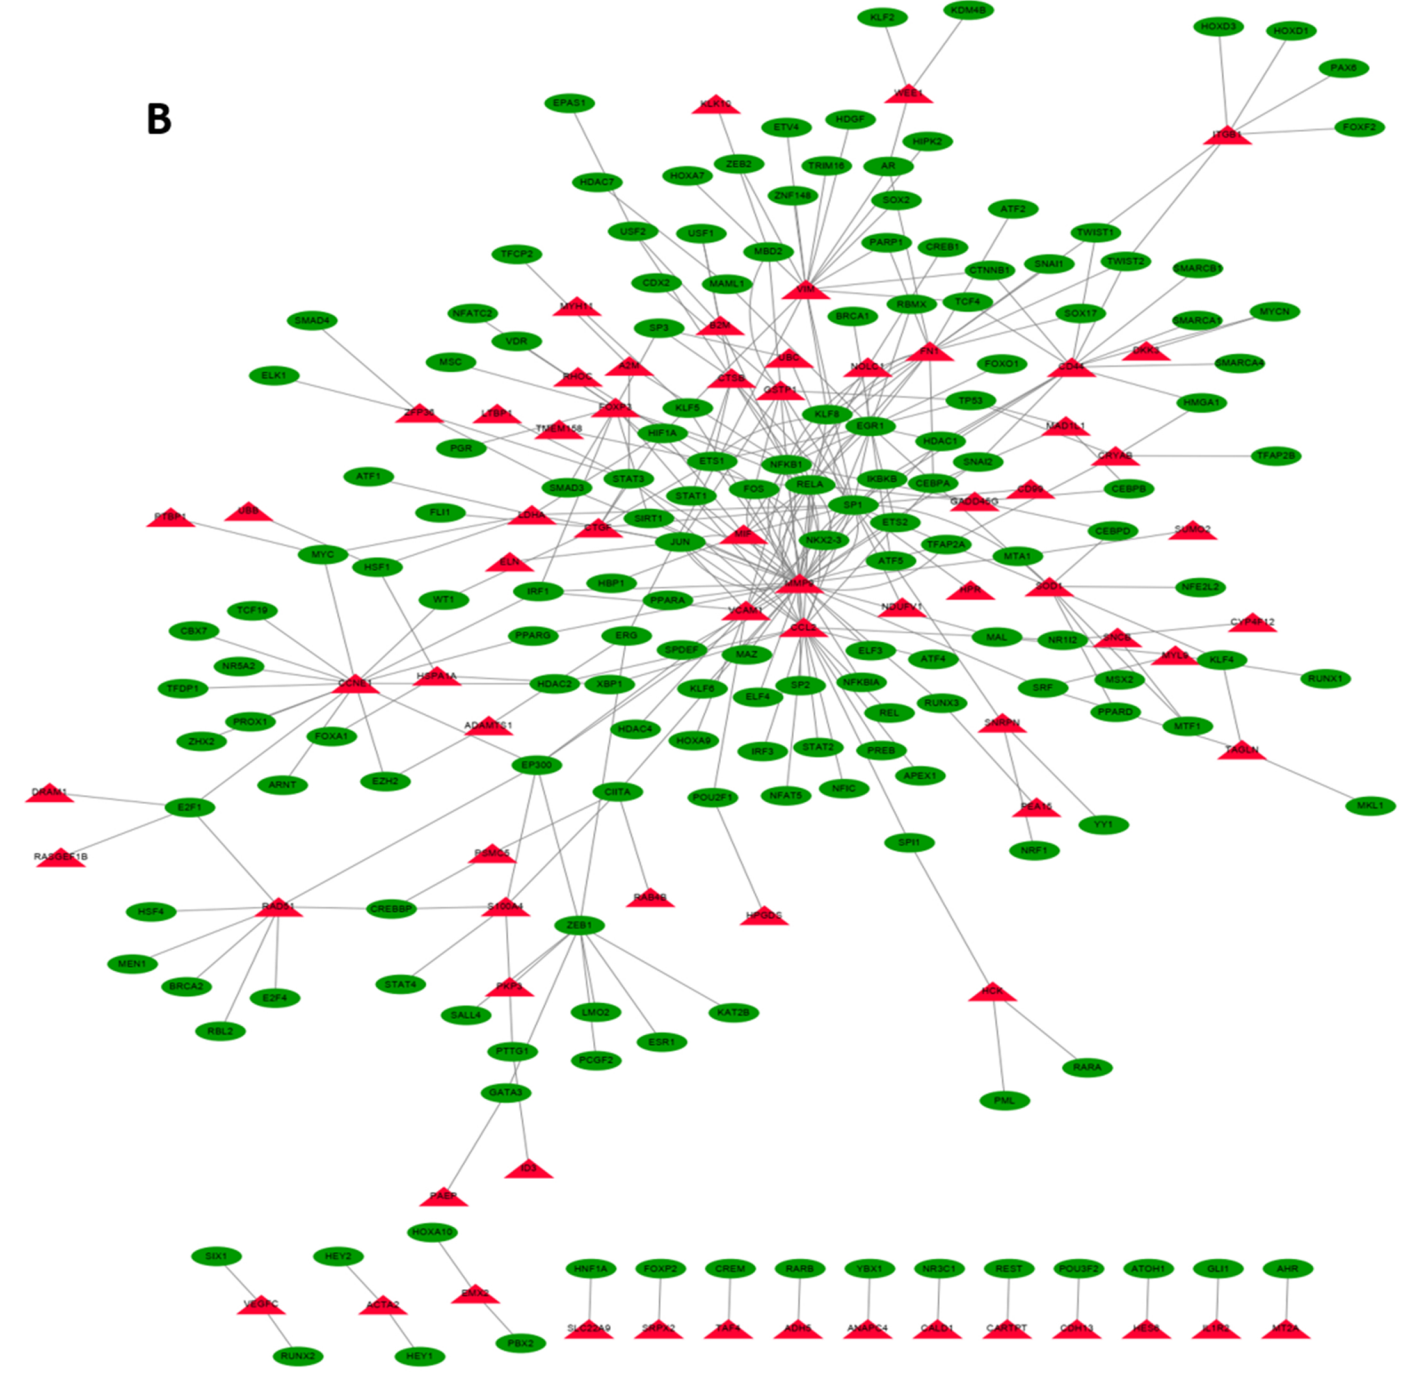

Supplement: f6 [file 5544276.f6.pdf]
