# Supplementary material for: Identification of Key Genes Associated with Endothelial Cell Dysfunction in Atherosclerosis Using Multiple Bioinformatics Tools
Source: Hindawi journal article supplement (doi:10.1155/2022/5544276), 2022-01-01

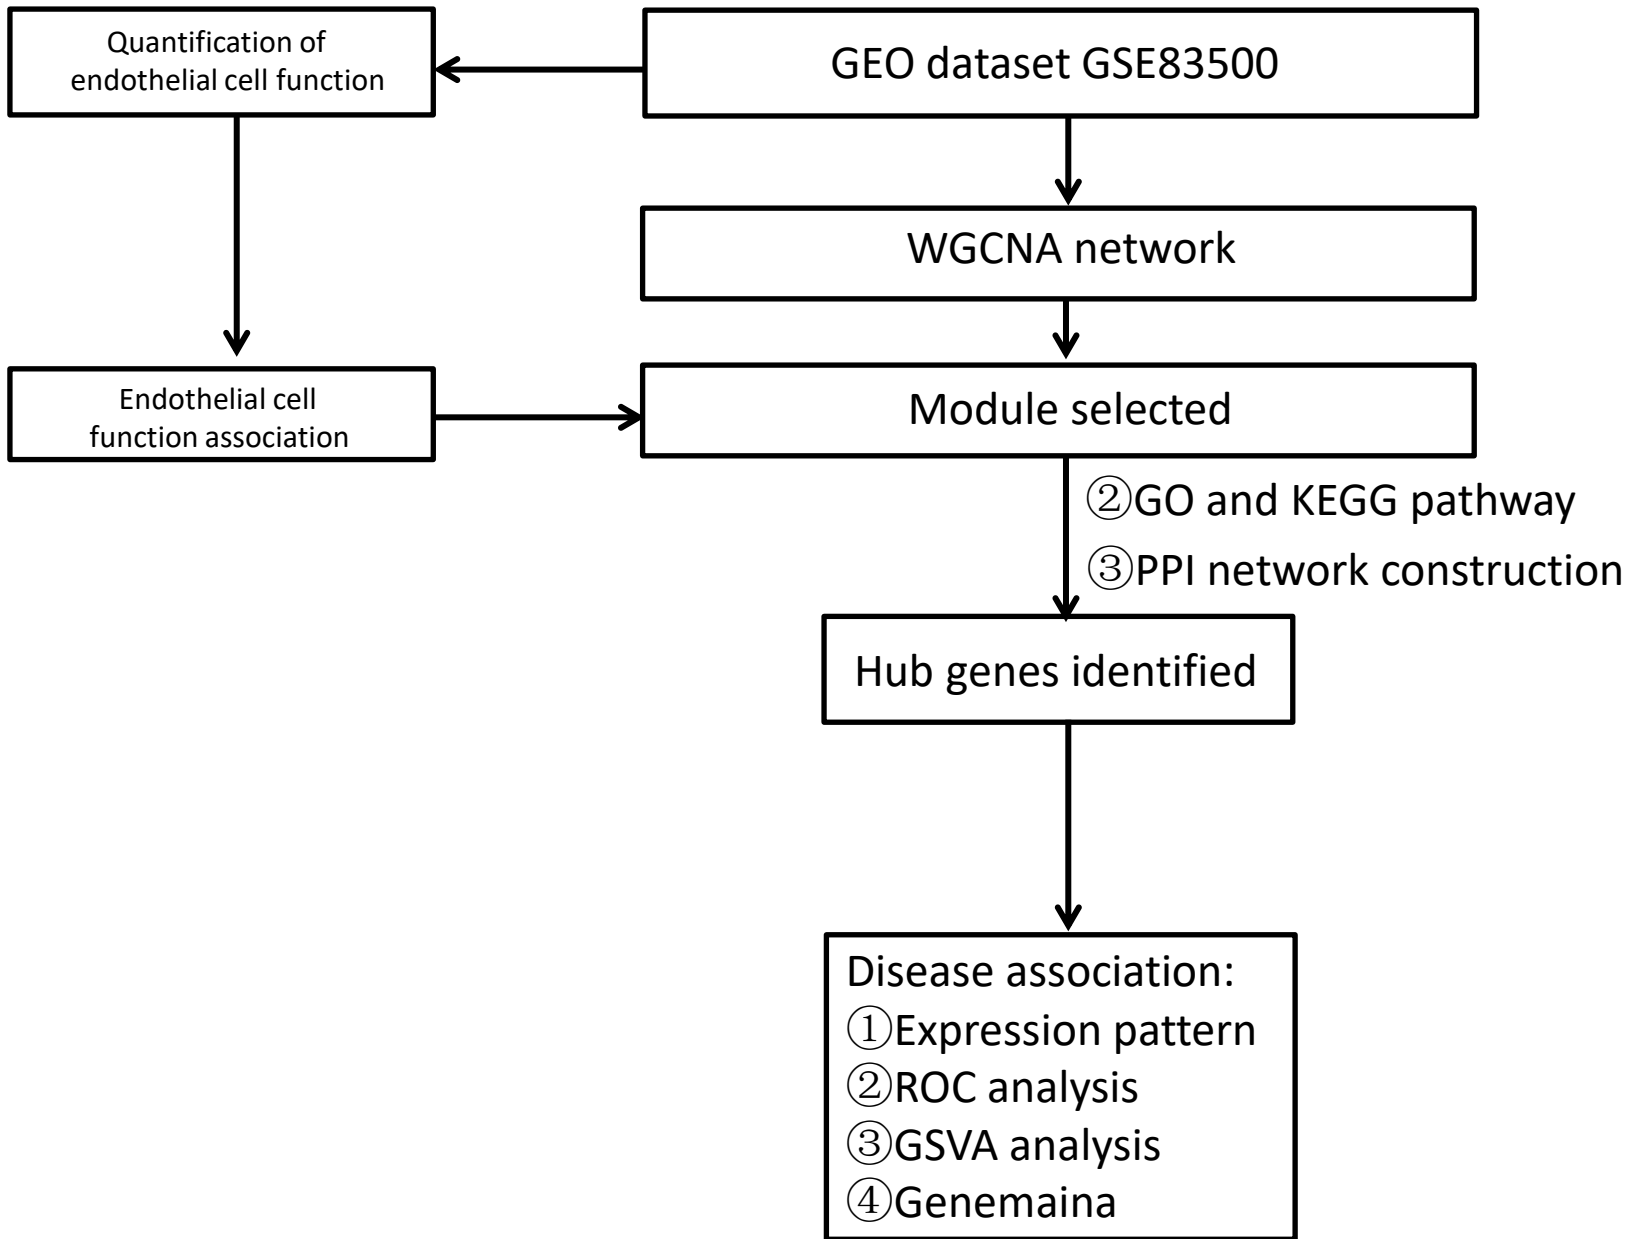

Supplement: f7 [file 5544276.f7.pdf]
