# Supplementary material for: Identification of Key Genes Associated with Endothelial Cell Dysfunction in Atherosclerosis Using Multiple Bioinformatics Tools
Source: Hindawi journal article supplement (doi:10.1155/2022/5544276), 2022-01-01
Supplement: f8 [file 5544276.f8.pdf]

# Protocol of Q-PCR

## 1: Extract sample total RNA

The Simple P Total RNA Extraction Kit (BioFlux, USA) was used to extract the total RNA of the sample. The experimental operation was carried out according to the product manual.

The experimental operation steps are as follows:

1. Grind the tissue sample with a mortar, weigh 30mg of tissue powder and put it into a 1.5ml centrifuge tube;
2. Add 600 $\mu$ L to the pretreated sample cracking solution R2, fully reverse and mix well, and stand at room temperature for 3-5min;
3. Suck the supernatant into a purification column sleeved with a liquid receiving tube and centrifuge at 12000rpm for 30s;
4. Discard the liquid in the liquid receiving pipe and add 600 $\mu$ L washing solution to the purification column, centrifuged at 12000rpm for 30s;
5. Discard the liquid in the liquid receiving pipe and wash it again;
6. The empty column was centrifuged at 10000rpm for 1min, and then the purified column was transferred to a new 1.5ml centrifuge tube;
7. Add eluent 30-50 $\mu$ L in the center of purification column membrane. Total RNA was obtained by standing at room temperature for 1 min and centrifugation at 12000rpm for 30s;
8. Measure the concentration and store at -80°C.

## 2: Reverse transcription

With PrimeScript™ RT reagent Kit with gDNA Eraser (Perfect Real Time) for reverse transcription. The experimental operation was carried out according to the product manual.

The steps are as follows:

Add the first part of 10 $\mu$ l reaction system into the reaction tube according to the following table and mix well.

| Reagent                       | 10 $\mu$ l reaction system |
|-------------------------------|----------------------------|
| 5 $\times$ gDNA Eraser Buffer | 2 $\mu$ l                  |
| gDNA Eraser                   | 1 $\mu$ l                  |
| Total RNA                     | 3 $\mu$ l                  |
| RNase Free H <sub>2</sub> O   | 4 $\mu$ l                  |

After heating at 42 °C for 2 minutes, place it at 4 °C, centrifuge briefly, collect the reaction solution, and add the following components:

| Reagent                                 | 20µl reaction system |
|-----------------------------------------|----------------------|
| Mixture                                 | 10µl                 |
| PrimeScript RT Enzyme Mix I             | 1µl                  |
| RT Primer Mix                           | 1µl                  |
| 5× PrimeScript Buffer 2 (for Real Time) | 4µl                  |
| RNase Free dH2O                         | 4µl                  |

The cDNA was obtained by heating at 37 °C for 15min, inactivating at 85 °C for 5S and placing at 4 °C.

### 3: Q-PCR

#### Instrument and analysis method

The model of fluorescence quantitative PCR instrument is Applied Biosystems® QuantStudio® 5. Use  $2^{-\Delta\Delta CT}$  method for relative quantitative analysis of data.

#### The operation process is as follows:

Reaction system: the experimental operation shall be carried out according to the product manual.

| Reagent                                          | 25µl reaction system |
|--------------------------------------------------|----------------------|
| TB Green Premix Ex Taq II (Tli RNaseH Plus) (2×) | 12.5µl               |
| PCR Forward Primer(10µM)                         | 1µl                  |
| PCR Reverse Primer(10µM)                         | 1µl                  |
| RT reaction solution (cDNA solution)             | 2µl                  |
| RNase-Free ddH2O                                 | 8.5µl                |

Reaction procedure:

| Cycles | Temperature | Time  |
|--------|-------------|-------|
| 1×     | 95°C        | 15min |
| 40×    | 95°C        | 10s   |
|        | 60°C        | 30s   |
