# Supplementary material for: Identification of Key Genes Associated with Endothelial Cell Dysfunction in Atherosclerosis Using Multiple Bioinformatics Tools
Source: Hindawi journal article supplement (doi:10.1155/2022/5544276), 2022-01-01
Supplement: f9 [file 5544276.f9.pdf]

# Lipofectamine® 2000 Reagent

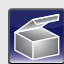

## Package Contents

| Catalog Number | Size         |
|----------------|--------------|
| 11668-030      | 0.3 mL vial  |
| 11668-027      | 0.75 mL vial |
| 11668-019      | 1.5 mL vial  |
| 11668-500      | 15 mL vial   |

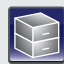

## Storage Conditions

Store at 4°C (do not freeze).

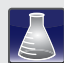

## Required Materials

- Plasmid DNA (0.5–5 µg/µL stock)
- Opti-MEM® Reduced Serum Medium
- Eppendorf tubes

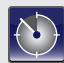

## Timing

Preparation: 10 minutes  
 Incubation: 5 minutes  
 Final Incubation: 1–3 days

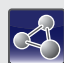

## Selection Guide

[Lipofectamine® Reagents](#)

Go online to view related products.

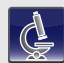

## Product Description

- Lipofectamine® 2000 Reagent is a proprietary formulation for transfecting nucleic acids into a wide range of eukaryotic cells.

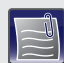

## Important Guidelines

- DNA-Lipofectamine® 2000 complexes must be made in serum-free medium such as Opti-MEM® Reduced Serum Medium and can be added directly to cells in culture medium, in the presence or absence of serum/antibiotic.
- It is not necessary to remove complexes or change/add medium after transfection.
- The amount of Lipofectamine® 2000 Reagent required for successful transfection varies depending on the cell type and passage number. Start any new transfection by testing the recommended four concentrations of Lipofectamine® 2000 Reagent to determine an optimum amount.

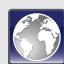

## Online Resources

Visit our [product page](#) for additional information and protocols. For support, visit [www.lifetechnologies.com/support](http://www.lifetechnologies.com/support).

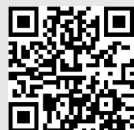

## Protocol Outline

- Plate cells so they will be 70–90% confluent at the time of transfection.
- Prepare plasmid DNA-lipid complexes.
- Add DNA-lipid complexes to cells.

## Lipofectamine® 2000 DNA Transfection Reagent Protocol

**i** See page 2 to view a typical DNA transfection procedure.

| Component                                  | 96-well    | 24-well    | 6-well      |
|--------------------------------------------|------------|------------|-------------|
| Final DNA per well                         | 100 ng     | 500 ng     | 2500 ng     |
| Final Lipofectamine® 2000 Reagent per well | 0.2–0.5 µL | 1.0–2.5 µL | 5.0–12.5 µL |

## Co-Transfection of Plasmid DNA and siRNA

Transfect plasmid DNA and siRNA at the same time using Lipofectamine® 2000 Reagent by adding 30 pmol (~0.6 µg) of siRNA per 1 µg of DNA.

## mRNA Transfection

mRNA can be transfected in a 24-well plate using Lipofectamine® 2000 Reagent by adding 0.5–1 µg of mRNA per well.

## **i** Photograph of Expected Results

## **i** Scaling Up or Down Transfections

## **i** Limited Product Warranty and Disclaimer Details

## Lipofectamine® 2000 DNA Transfection Reagent Protocol

Transfect cells according to the following chart. Volumes are given on a per-well basis. Each reaction mix is sufficient for triplicate (96-well), duplicate (24-well), and single well (6-well) transfections, and accounts for pipetting variations. Adjust the amounts of components according to your tissue culture format. For additional information on scaling your transfection reaction, see page 1.

| Timeline                                                                    |                                                           | Steps                                                                               | Procedure Details                                                                |                                                 |                            |                         |                          |         |
|-----------------------------------------------------------------------------|-----------------------------------------------------------|-------------------------------------------------------------------------------------|----------------------------------------------------------------------------------|-------------------------------------------------|----------------------------|-------------------------|--------------------------|---------|
| Day 0                                                                       | 1                                                         |    | <b>Seed cells to be 70–90% confluent at transfection</b>                         | Component                                       | 96-well                    | <u>24-well</u>          | 6-well                   |         |
|                                                                             | 2                                                         |    | <b>Dilute four amounts of Lipofectamine® Reagent in <u>Opti-MEM® Medium</u></b>  | Adherent cells                                  | 1–4 × 10 <sup>4</sup>      | 0.5–2 × 10 <sup>5</sup> | 0.25–1 × 10 <sup>6</sup> |         |
| Day 1                                                                       | 3                                                         |    | <b>Dilute DNA in <u>Opti-MEM® Medium</u></b>                                     | Opti-MEM® Medium                                | 25 µL × 4                  | 50 µL × 4               | 150 µL × 4               |         |
|                                                                             | 4                                                         |    | <b>Add diluted DNA to diluted Lipofectamine® 2000 Reagent (<u>1:1 ratio</u>)</b> | Lipofectamine® 2000 Reagent                     | <b>i</b> 1, 1.5, 2, 2.5 µL | <b>i</b> 2, 3, 4, 5 µL  | <b>i</b> 6, 9, 12, 15 µL |         |
|                                                                             | 5                                                         |   | <b>Incubate</b>                                                                  | Opti-MEM® Medium                                | 125 µL                     | 250 µL                  | 700 µL                   |         |
|                                                                             | 6                                                         |  | <b>Add DNA-lipid complex to cells</b>                                            | DNA (0.5–5 µg/µL)                               | 2.5 µg                     | 5 µg                    | 14 µg                    |         |
|                                                                             | 7                                                         |  | <b>Visualize/analyze transfected cells</b>                                       | Diluted DNA Total                               | 25 µL                      | 50 µL                   | 150 µL                   |         |
| Day 2–4                                                                     |                                                           |                                                                                     |                                                                                  | Diluted Lipofectamine® 2000 Reagent             | 25 µL                      | 50 µL                   | 150 µL                   |         |
|                                                                             | <b><u>Incubate for 5 minutes at room temperature.</u></b> |                                                                                     |                                                                                  |                                                 | Component                  | 96-well                 | 24-well                  | 6-well  |
|                                                                             |                                                           |                                                                                     |                                                                                  |                                                 | DNA-lipid complex per well | 10 µL                   | 50 µL                    | 250 µL  |
|                                                                             |                                                           |                                                                                     |                                                                                  |                                                 | Final DNA used per well    | 100 ng                  | 500 ng                   | 2500 ng |
|                                                                             |                                                           |                                                                                     |                                                                                  | Final Lipofectamine® 2000 Reagent used per well | 0.2–0.5 µL                 | 1.0–2.5 µL              | 5.0–12.5 µL              |         |
| <b>Incubate cells for 1–3 days at 37°C. Then analyze transfected cells.</b> |                                                           |                                                                                     |                                                                                  |                                                 |                            |                         |                          |         |
